# Supplementary material for: A vaccine consisting of Schistosoma mansoni cathepsin B formulated in Montanide ISA 720 VG induces high level protection against murine schistosomiasis
Source: Springer Nature journal article supplement (doi:10.1186/s12879-016-1444-z), 2016-03-05
Supplement: MOESM1 [file 9740884]

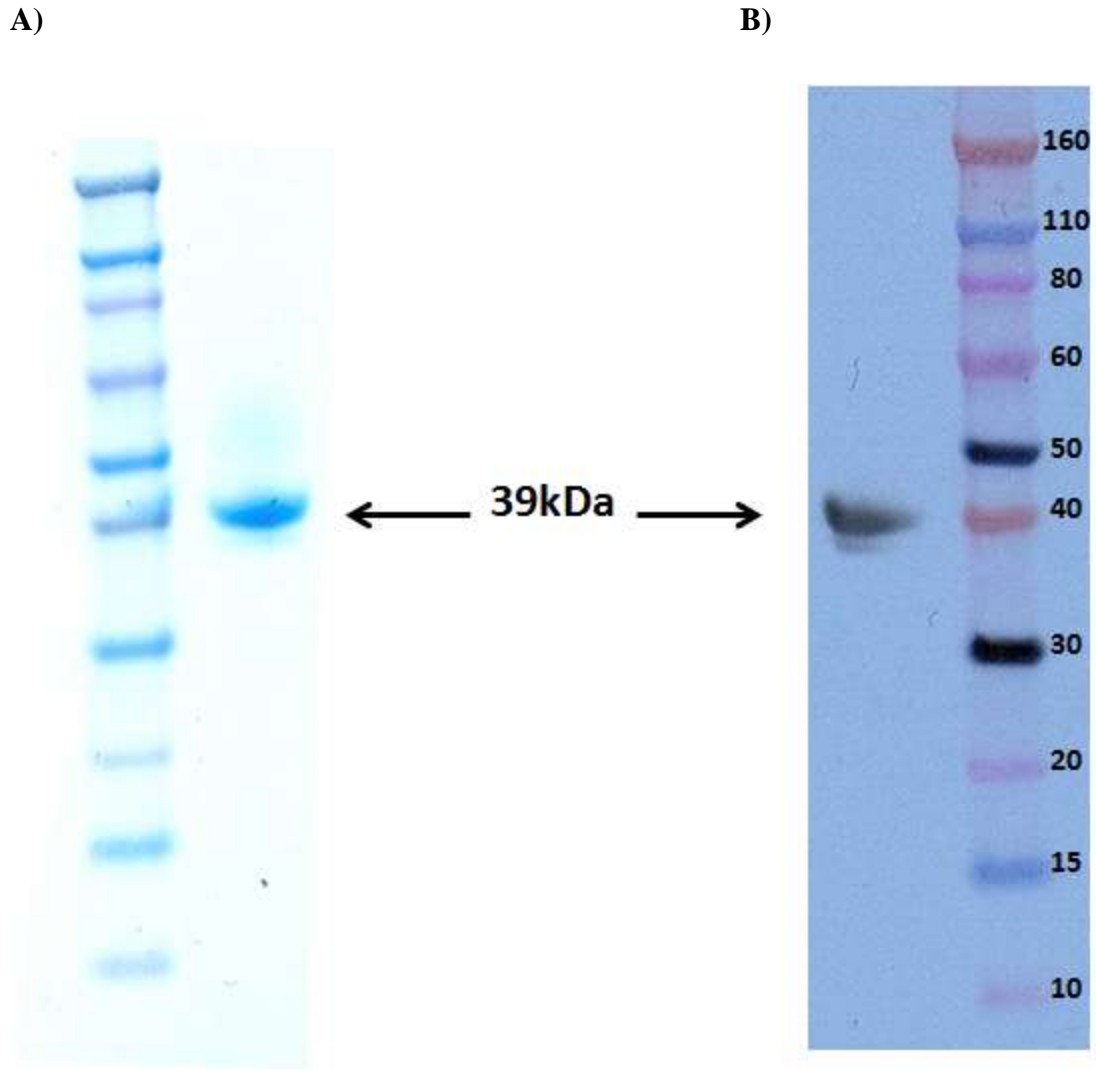

**Supplemental Fig 1. Recombinant Sm-Cathepsin B expression in *Pichia pastoris*.** The Coomassie stained polyacrylamide gel shows the representative band at 39kDa (**a**). This same band is also seen upon western blot analysis using anti-His tag antibodies (**b**).
