# Supplementary material for: A vaccine consisting of Schistosoma mansoni cathepsin B formulated in Montanide ISA 720 VG induces high level protection against murine schistosomiasis
Source: Springer Nature journal article supplement (doi:10.1186/s12879-016-1444-z), 2016-03-05
Supplement: MOESM2 [file 9740884]

**Table 1. Burden reductions observed in mice vaccinated with Sm- Cathepsin B and Montanide ISA 720 VG compared to Saline control mice**

| <b>Group</b>                                       | <b>Worm Burden (mean ± SE)</b> | <b>Percent Reduction (<math>p \leq 0.001</math>)</b> | <b>Eggs/g of Liver (mean ± SE)</b> | <b>Percent Reduction in experimental group (<math>p \leq 0.001</math>)</b> | <b>Eggs/g of Intestine (mean ± SE)</b> | <b>Percent Reduction in experimental group (<math>p \leq 0.001</math>)</b> |
|----------------------------------------------------|--------------------------------|------------------------------------------------------|------------------------------------|----------------------------------------------------------------------------|----------------------------------------|----------------------------------------------------------------------------|
| Saline (control)                                   | 48.8 ± 3.5                     | -                                                    | 14791.6 ± 1080.1                   | -                                                                          | 17800.2 ± 1421.8                       | -                                                                          |
| Sm-Cathepsin B + Montanide ISA 20VG (experimental) | 16.4 ± 2.5                     | 66.4%                                                | 4578.5 ± 492.9                     | 69.1%                                                                      | 7292.8 ± 1173.1                        | 59.0%                                                                      |

The percent reduction values stated in Table 1 represent the decrease in parasite burden (worms and eggs) observed in the experimental animals when compared to the saline control animals. SE: standard error
